# Supplementary material for: Transperineal Laser Ablation for Benign Prostatic Enlargement: A Systematic Review and Pooled Analysis of Pilot Studies
Source: MDPI journal article supplement (doi:10.3390/jcm12051860), 2023-02-26
Supplement: s1 [file s1]

# Supplementary Materials

**Table S1.** PICOTS (Population, Intervention, Comparators, Outcomes, Timing, and Setting) format.

|                           |                                                                                                                                                                                                                                                                                                                           |
|---------------------------|---------------------------------------------------------------------------------------------------------------------------------------------------------------------------------------------------------------------------------------------------------------------------------------------------------------------------|
| <b>Population</b>         | Age: >40 yrs.<br>Diagnoses: moderate/severe Lower Urinary Tract Symptoms (LUTS) due to Benign Prostate Enlargement (BPE) and lack of efficacy, intolerance, or poor compliance to previous medical therapies.                                                                                                             |
| <b>Interventions</b>      | Transperineal Laser Ablation (TPLA) for Benign Prostatic Enlargement                                                                                                                                                                                                                                                      |
| <b>Comparators</b>        | None                                                                                                                                                                                                                                                                                                                      |
| <b>Outcomes</b>           | Improvement in urodynamic parameters (maximum urinary flow ( $Q_{max}$ ) and postvoiding residue (PVR))<br>Symptom relief (IPPS, International Prostatic Symptoms Score questionnaire)<br>Preservation of ejaculatory function (MSHQ-EjD, Male Sexual Health Questionnaire-Ejaculatory Dysfunction)<br>Complication rates |
| <b>Type of studies</b>    | Prospective or retrospective studies including more than 20 patients                                                                                                                                                                                                                                                      |
| <b>Timing and setting</b> | Any timepoint and setting                                                                                                                                                                                                                                                                                                 |

**Table S2.** Level of evidence for the evaluated studies according to GRADE and Oxford systems, and quality of the studies assessed with Newcastle-Ottawa scale.

| Study ID                                                 | Year | Level of Evidence According to: |               | Quality |
|----------------------------------------------------------|------|---------------------------------|---------------|---------|
|                                                          |      | Grade System                    | Oxford System |         |
| Pacella et al.,<br>Prostate Cancer and Prostatic Disease | 2019 | 2                               | 2b            | 5       |
| De Rienzo et al.,<br>European Urology                    | 2021 | 2                               | 2b            | 6       |
| Cai et al.,<br>Acta Radiologica                          | 2021 | 2                               | 2b            | 6       |
| Manenti et al.,<br>European Radiology Experimental       | 2021 | 2                               | 2b            | 6       |
| Frego et al.,<br>World Journal of Urology                | 2021 | 2                               | 2b            | 5       |
| Sessa et al.,<br>Urology Video Journal                   | 2022 | 2                               | 2b            | 5       |

**Table S3.** Summary of rates and type of complications or sequelae and associated management in patients treated with transperineal laser ablation (TPLA) for benign prostatic enlargement (BPE) in the six included studies.

| Study                                                             | N   | Type and Number of Complications | Management                           | Complication Rate | Clavien–Dindo |
|-------------------------------------------------------------------|-----|----------------------------------|--------------------------------------|-------------------|---------------|
| Pacella et al.,<br>Prostate Cancer and Prostatic Disease,<br>2019 | 160 | 3—transient hematuria            | None                                 | 1.9%              | I             |
|                                                                   |     | 3—acute urinary retention        | Bladder catheter for 15 days         | 1.9%              | I             |
|                                                                   |     | 1—orchitis                       | Antibiotic                           | 0.6%              | II            |
|                                                                   |     | 1—prostatic abscess              | Antibiotic and percutaneous drainage | 0.6%              | IIIa          |
| De Rienzo et al.,<br>European Urology,<br>2021                    | 21  | 1—prostatic abscess              | Antibiotic and percutaneous drainage | 4.8%              | IIIa          |
| Cai et al.,<br>Acta Radiologica,<br>2021                          | 20  | 1—Intraoperative urethral burn   | Bladder catheter for 25 days         | 5.0%              | I             |
| Manenti et al.,<br>European Radiology Experimental,<br>2021       | 44  | 1—prolonged hematuria            | Bladder catheter for 7 days          | 2.2%              | I             |
|                                                                   |     | 1—orchitis (ATB)                 | Antibiotic                           | 2.2%              | II            |
|                                                                   |     | 1—prostatic abscess              | Antibiotic and percutaneous drainage | 2.2%              | IIIa          |
| Frego et al.,<br>World Journal of Urology,<br>2021                | 22  | 8—dysuria spontaneously resolved | None                                 | 36.4%             | I             |
|                                                                   |     | 3—acute urinary retention        | Bladder catheter for 7 days          | 13.6%             | I             |
|                                                                   |     | 2—urinary tract infection        | Hospitalization and antibiotic       | 9.0%              | II            |
| Sessa et al.,<br>Urology Video Journal,<br>2022                   | 30  | NR                               | NR                                   | NR                | NR            |

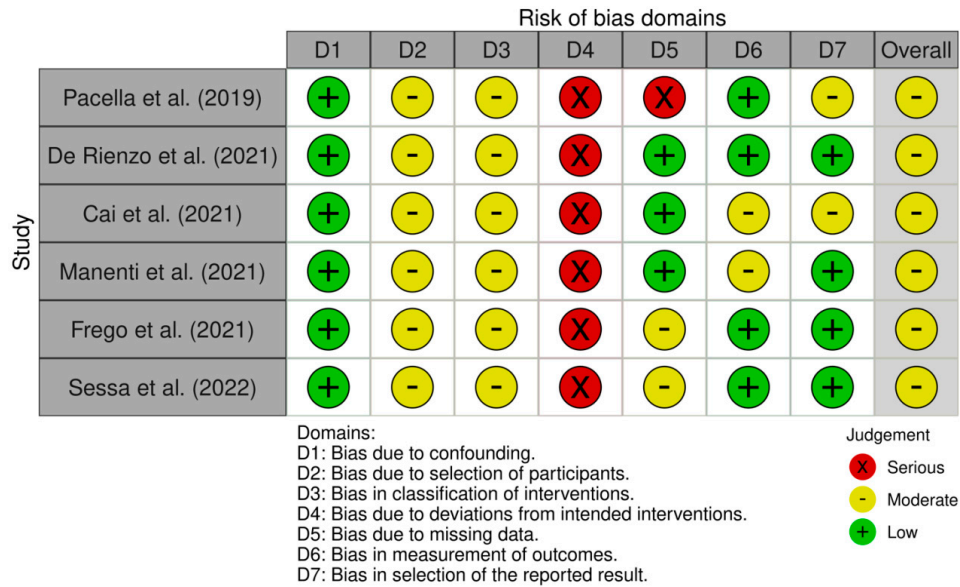

**Figure S1.** Risk of bias summary showing review authors' judgments about each risk of bias item for each included study.

#### Baseline PVR

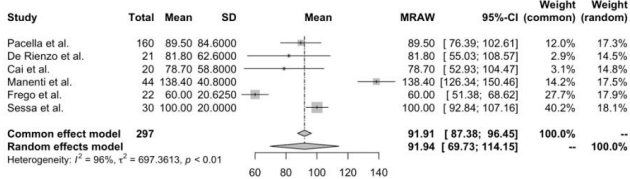

#### Baseline QoL

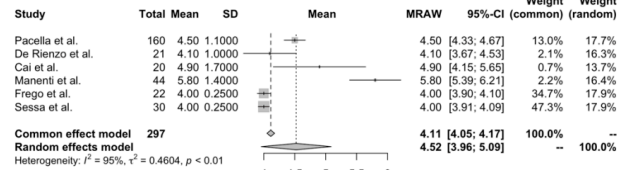

#### 3-months PVR

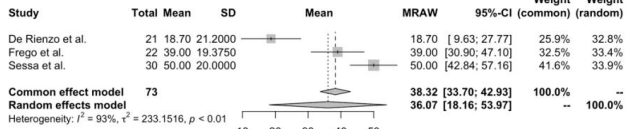

#### 3-months QoL

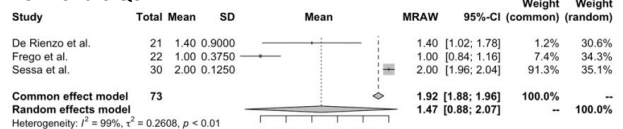

#### 6-months PVR

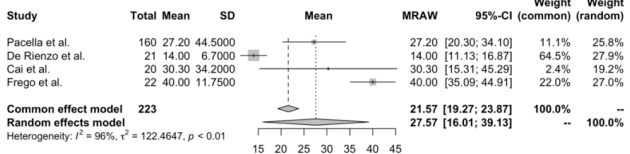

#### 6-months QoL

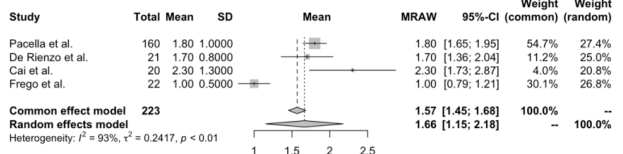

#### 12-months PVR

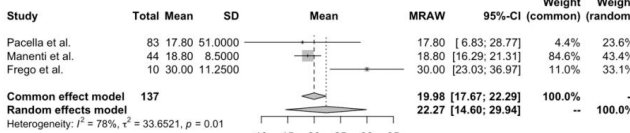

#### 12-months QoL

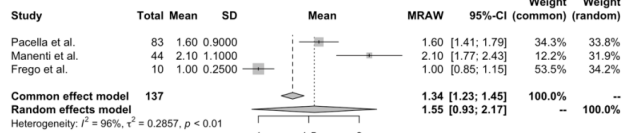

**Figure S2.** Forest plots illustrating the pooled mean and 95% confidence interval (CI) for postvoiding residue (PVR) and quality of life (QoL) at baseline and during follow-up.

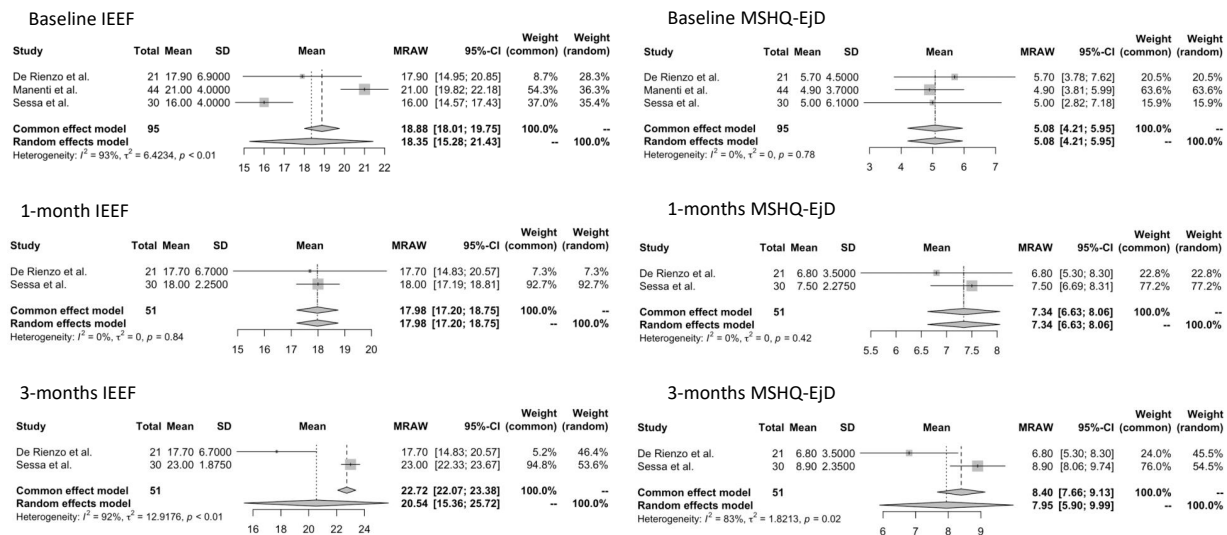

**Figure S3.** Forest plots illustrating the pooled mean and 95% confidence interval (CI) for International Index of Erectile Function (IIEF-5) and Male Sexual Health Questionnaire-Ejaculatory Dysfunction (MSHQ-EjD) at baseline and during follow-up.
